# Supplementary material for: Spectrum of genetic variants associated with maple syrup urine disease in the Middle East, North Africa, and Türkiye (MENAT): a systematic review
Source: BMC Med Genomics. 2025 Mar 13;18:49. doi: 10.1186/s12920-025-02083-x (PMC11905697; doi:10.1186/s12920-025-02083-x)
Supplement: Supplementary file 4 — Supplementary Material 4. [file 12920_2025_2083_MOESM4_ESM.xlsx]

## Sheet: Sheet1
A
Reference	Study	CK1	CK2	CK3	CK4	CK5	CK6	CK7	CK8	CK9	CK10	CK11	CK12	CK13	CK14	Quality
(Tabbouche et al., 2014)	Cross-sectional	Y	Y	NA	Y	NA	NA	NA	NA	Y	NA	Y	NA	NA	NA	Good
(Imtiaz et al., 2017)	Cross-sectional	Y	Y	NA	Y	NA	NA	NA	NA	Y	NA	Y	NA	NA	NA	Good
(Abiri et al., 2016)	Cross-sectional	Y	Y	NA	N	NA	NA	NA	NA	Y	NA	Y	NA	NA	NA	Good
(Abiri et al., 2019)	Cross-sectional	Y	Y	NA	Y	NA	NA	NA	NA	Y	NA	Y	NA	NA	NA	Good
(Dursun et al., 2002)	Cross-sectional	Y	Y	NA	N	NA	NA	NA	NA	Y	NA	Y	NA	NA	NA	Good
(Gorzelany et al., 2009)	Cross-sectional	Y	Y	NA	Y	NA	NA	NA	NA	Y	NA	Y	NA	NA	NA	Good
(Khalifa et al., 2020)	Cross-sectional	Y	Y	NA	N	NA	NA	NA	NA	Y	NA	Y	NA	NA	NA	Good
(Jaafar et al., 2013)	Cross-sectional	Y	Y	NA	Y	NA	NA	NA	NA	Y	NA	Y	NA	NA	NA	Good
(Abiri et al., 2017)	Cross-sectional	Y	Y	NA	Y	NA	NA	NA	NA	Y	NA	Y	NA	NA	NA	Good
(Henneke et al., 2003)	Cross-sectional	Y	Y	NA	Y	NA	NA	NA	NA	Y	NA	Y	NA	NA	NA	Good
(Alijanpour et al., 2022)	Cross-sectional	Y	Y	NA	Y	NA	NA	NA	NA	Y	NA	Y	NA	NA	NA	Good
(Simon et al., 2005)	Cross-sectional	y	y	NA	CD	NA	NA	NA	NA	Y	NA	Y	NA	NA	NA	Good
(Ozcelik et al., 2023)	Cross-sectional	y	y	NA	CD	NA	NA	NA	NA	Y	NA	Y	NA	NA	NA	Good
(Jaradat et al., 2016)	Cross-sectional	Y	Y	NA	CD	NA	NA	NA	NA	Y	NA	Y	NA	NA	NA	Good
(Flaschker et al., 2007)	Cross-sectional	y	y	NA	CD	NA	NA	NA	NA	Y	NA	Y	NA	NA	NA	Good
B
Reference	Study	CK1	CK2	CK3	CK4	CK5	CK6	CK7	CK8	CK9	Quality
(Bremer et al., 2016)	Case-report	Y	Y	NR	NA	NA	Y	NA	CD	Y	Good
Quality of included studies was assessed using two National Institutes of Health (NIH) tools [https://www.nhlbi.nih.gov/health-topics/study-quality-assessment-tools]:
(A) The NIH Quality Assessment tool for Observational Cohort and Cross-Sectional Studies. CK1. Was the research question or objective in this paper clearly stated? CK2. Was the study population clearly specified and defined? CK3. Was the participation rate of eligible persons at least 50%? CK4. Were all the subjects selected or recruited from the same or similar populations (including the same ti…
(B) The NIH Quality Assessment tool for Case Series Studies. CK1. Was the study question or objective clearly stated? CK2. Was the study population clearly and fully described, including a case definition? CK3. Were the cases consecutive? CK4. Were the subjects comparable? CK5. Was the intervention clearly described? CK6. Were the outcome measures clearly defined, valid, reliable, and implemented…
CK, check list; CD, cannot determine, NA, not applicable; NR, not reported; N, no; Y, yes.
